# Supplementary material
Source: Springer Nature journal article supplement (https://www.springermedizin.de/resource/supplementary/12916_2013_904_MOESM2_ESM.pdf/9598910)
Supplement: MOESM2 [file 9598910]

Potentially relevant records identified through database searches (N=1019)

Removal of 783 duplicates

Potentially relevant records identified and screened for retrieval (N=236)

**Articles excluded (N=214)**

- Animal studies (N=93)
- Not focused on *BDNF* Val<sup>66</sup>Met polymorphism (N=66)
- Gene-environment interactions not examined (N=39)
- Single symptoms or restricted number of mood disorders investigated (N=3)
- Gross departure from Hardy-Weinberg Equilibrium (N=1)
- Not focused on depression specifically (N=11)
- Gene-environment interaction examined twice in same sample (N=1)

Included articles (N=22)
